# Supplementary material
Source: PubMed Central journal article supplement (PMC3246636)
Supplement: NIHMS318932-supplement-Supp_Material.pdf [file NIHMS318932-supplement-Supp_Material.pdf]

Partial Least Squares Analysis: Forebrain and Face

Singular values and pairwise correlations of PLS scores between blocks:

|       | Singular value | P-value (perm.) | % total covar. | Correlation | P-value (perm.) |
|-------|----------------|-----------------|----------------|-------------|-----------------|
| PLS1  | 0.00078771     | <.0001          | 37.192         | 0.74786     | 0.1454          |
| PLS2  | 0.00059414     | <.0001          | 21.159         | 0.66346     | 0.0618          |
| PLS3  | 0.00049086     | <.0001          | 14.442         | 0.6134      | 0.0063          |
| PLS4  | 0.00036554     | <.0001          | 8.009          | 0.61169     | 0.0001          |
| PLS5  | 0.0002867      | 0.0337          | 4.927          | 0.63743     | 0.0453          |
| PLS6  | 0.00023822     | 0.0008          | 3.402          | 0.54054     | 0.0007          |
| PLS7  | 0.00022273     | 0.0032          | 2.973          | 0.54068     | 0.0104          |
| PLS8  | 0.00017112     | 0.0003          | 1.755          | 0.48826     | 0.064           |
| PLS9  | 0.00016112     | <.0001          | 1.556          | 0.55279     | 0.0598          |
| PLS10 | 0.00015471     | <.0001          | 1.435          | 0.59586     | 0.3999          |
| PLS11 | 0.0001205      | <.0001          | 0.87           | 0.51642     | 0.2532          |
| PLS12 | 0.00011021     | 0.0005          | 0.728          | 0.58055     | 0.0182          |
| PLS13 | 0.0000893      | <.0001          | 0.478          | 0.52426     | 0.0073          |
| PLS14 | 0.00007031     | 0.0041          | 0.296          | 0.50826     | 0.0584          |
| PLS15 | 0.00006412     | 0.0824          | 0.246          | 0.43496     | 0.0377          |
| PLS16 | 0.00005391     | 0.0446          | 0.174          | 0.42591     | 0.4451          |
| PLS17 | 0.00005042     | 0.0884          | 0.152          | 0.47518     | 0.0286          |
| PLS18 | 0.00004249     | 0.0115          | 0.108          | 0.50232     | 0.0005          |
| PLS19 | 0.00002683     | 0.7263          | 0.043          | 0.35492     | 0.0572          |
| PLS20 | 0.00002323     | 0.2514          | 0.032          | 0.44247     | 0.0361          |
| PLS21 | 0.00001824     | 0.54            | 0.02           | 0.33299     | 0.0977          |
